# Supplementary material for: A microcapsule-based reusable self-reporting system using a donor–acceptor Stenhouse adduct
Source: Royal Society of Chemistry journal article supplement (doi:10.1039/d4ra00925h), 2024-01-01
Supplement: d4ra00925h1.pdf [file d4ra00925h1.pdf]

## Supporting Information

# Microcapsule-based Reusable Self-reporting System using Donor-Acceptor Stenhouse Adduct

Soonyoung Choi,<sup>‡a</sup> Gyeong Eun Kim,<sup>‡a</sup> Hyoungeun Bae,<sup>‡a</sup> Su Jeong Choi,<sup>a</sup> Ji-Eun Jeong,<sup>a</sup> Jin Chul Kim,<sup>a</sup> Hanah Na,<sup>a</sup> Hoyocheol Jung,<sup>\*a</sup> Yu Jin Jung,<sup>\*a</sup> Sang-Ho Lee,<sup>\*ab</sup> and Young Il Park

<sup>\*a</sup>

<sup>a</sup> *Center for Advanced Specialty Chemicals, Korea Research Institute of Chemical Technology, Ulsan, 44412, Republic of Korea*

<sup>b</sup> *Department of Chemical & Biochemical Engineering, Dongguk University, Seoul, 04620, Republic of Korea*

<sup>‡</sup>These authors contributed equally to this work

<sup>\*</sup> Corresponding authors:

Dr. Hoyocheol Jung ([hjung@kriict.re.kr](mailto:hjung@kriict.re.kr)), Dr. Yu Jin Jung ([yjjung@kriict.re.kr](mailto:yjjung@kriict.re.kr)), Dr. Sang-Ho Lee ([slee@kriict.re.kr](mailto:slee@kriict.re.kr)), Dr. Young Il Park ([ypark@kriict.re.kr](mailto:ypark@kriict.re.kr))

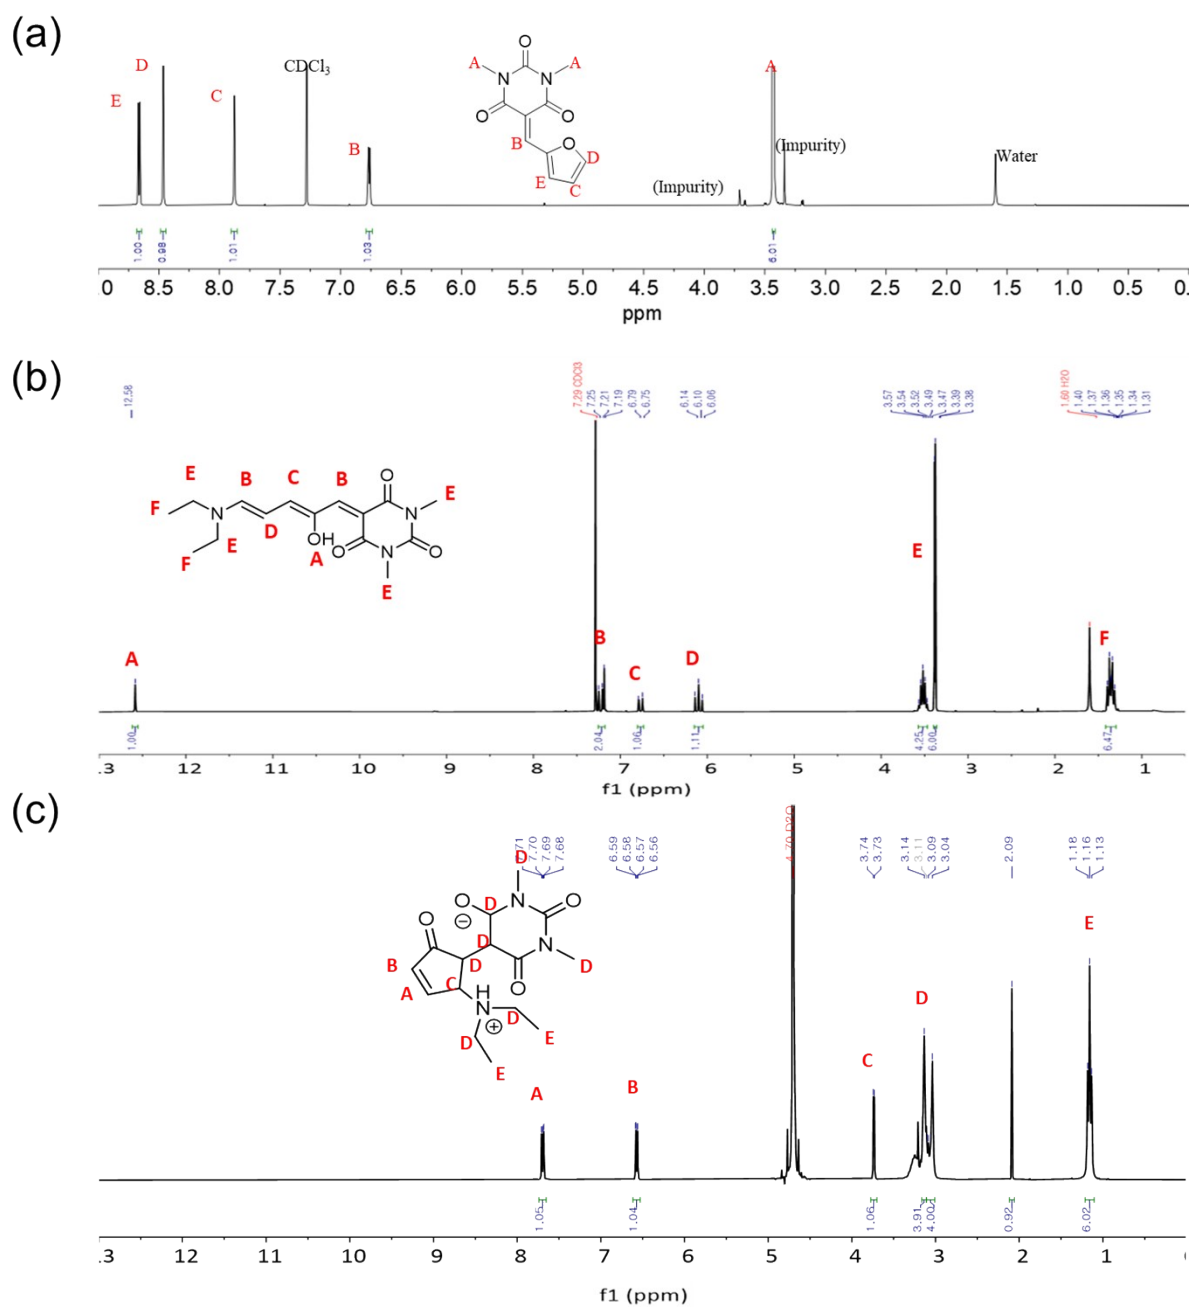

Figure S1.  $^1\text{H-NMR}$  spectra of (a) DASA precursor (b) the linear DASA and (c) the cyclic DASA

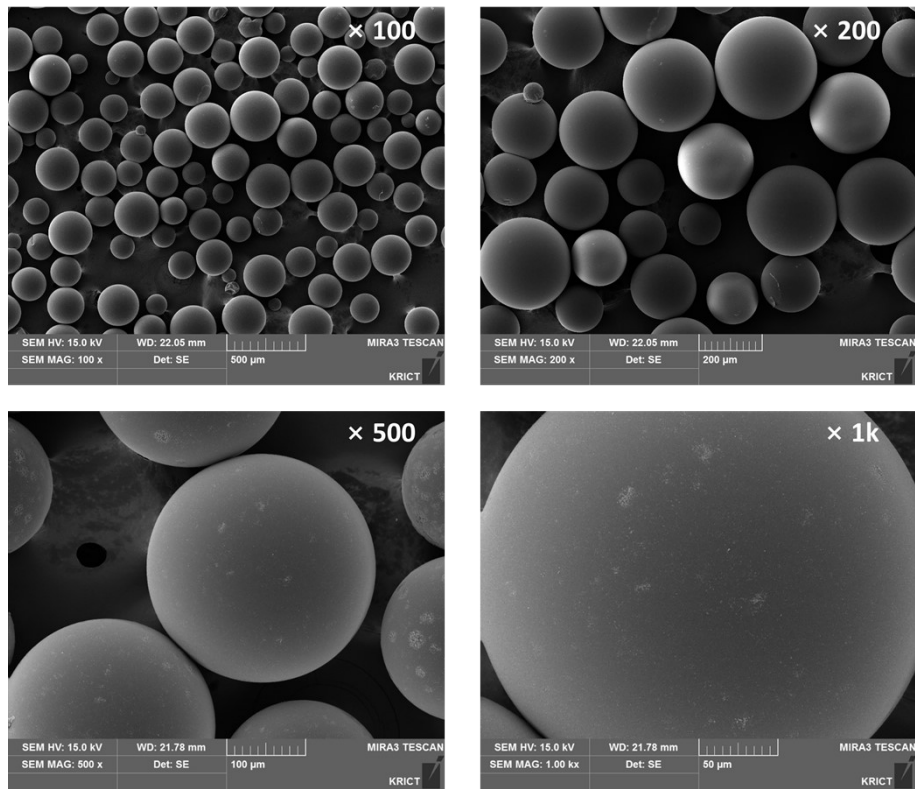

Figure S2. SEM image of microcapsules obtained at optimum condition

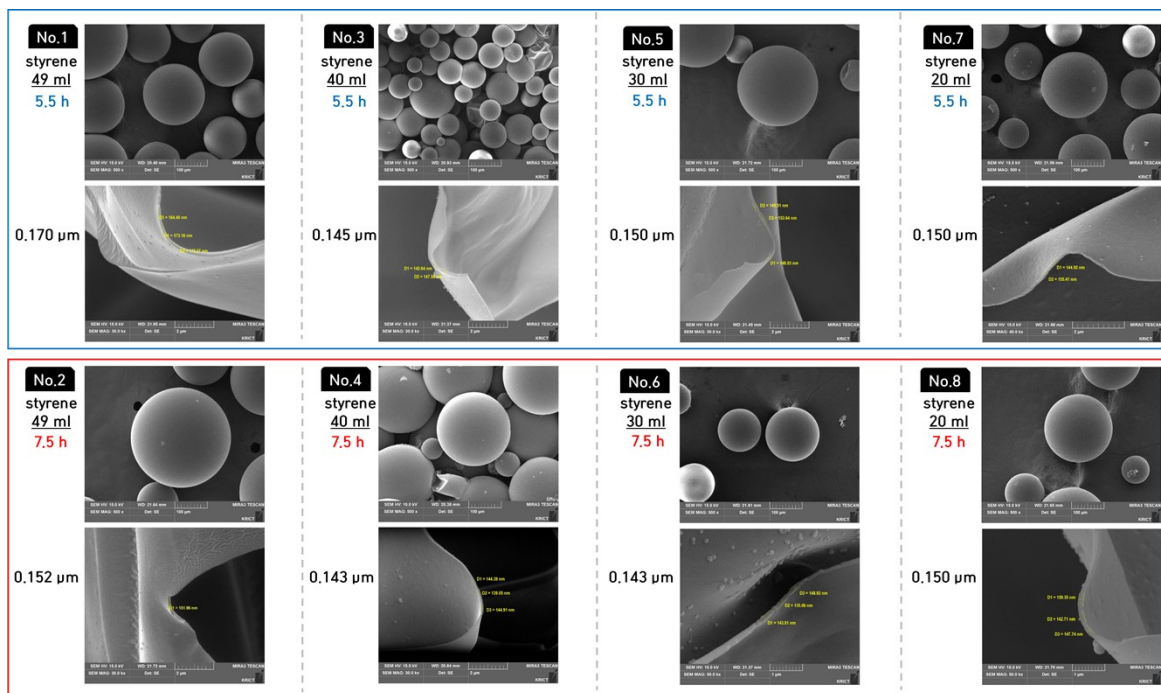

Figure S3. Surface and shell morphology of microcapsules obtained at various styrene amounts and reaction times.

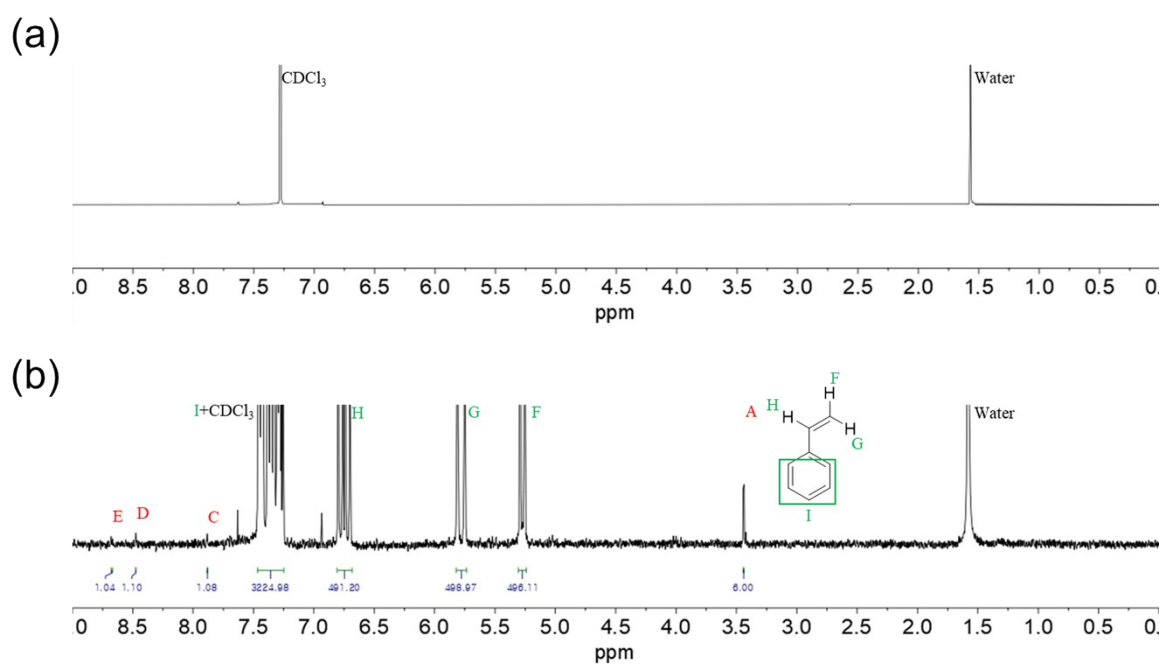

Figure S4.  $^1\text{H-NMR}$  spectra of the microcapsules (a) before and (b) after crushing.

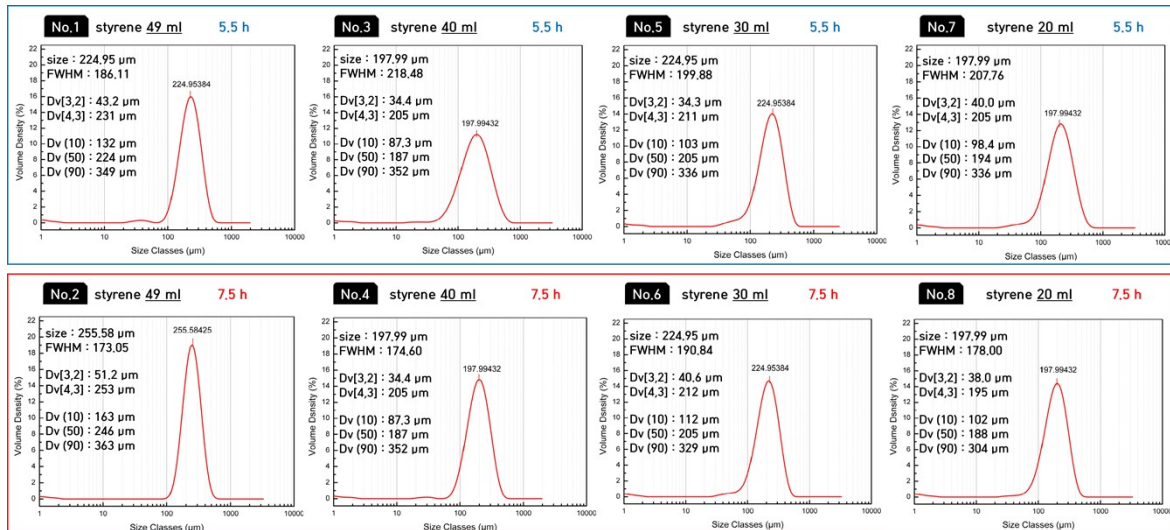

Figure S5. Particle size distribution of microcapsules obtained at various styrene amounts and reaction times.

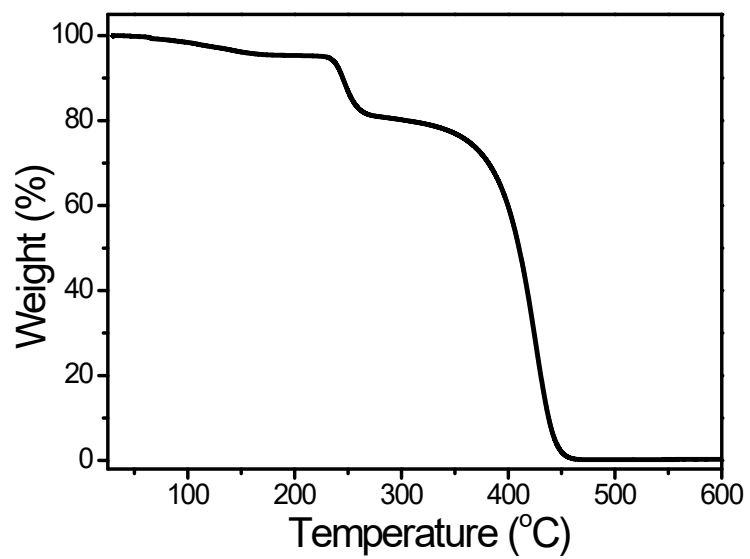

**Figure S6.** TGA diagram of the microcapsules.

Table S1. General(optimum) preparation condition for microcapsules

|                   | <b>Urea</b>         | <b>Resorcinol</b> | <b>37 wt%</b> | <b>NH<sub>4</sub>Cl</b> | <b>Styrene</b> | <b>DASA</b> |
|-------------------|---------------------|-------------------|---------------|-------------------------|----------------|-------------|
|                   | <b>Formaldehyde</b> |                   |               |                         |                |             |
| <b>mol ratio</b>  | 1                   | 0.0543            | 2.13          | 0.111                   | 10.2           | 0.00842     |
| <b>MW(g/mol)</b>  | 60.06               | 110.11            | 30.03         | 53.49                   | 104.15         | 284.32      |
| <b>Mol</b>        | 0.0418              | 0.00227           | 0.0892        | 0.00467                 | 0.428          | 0.000352    |
| <b>weight (g)</b> | 2.51                | 0.250             | 2.68          | 0.250                   | 44.54          | 0.200       |
|                   | (solution:7.19)     |                   |               |                         |                |             |

A 2.5 wt% aqueous solution of EMA (40 mL) was added to distilled water (85 mL), to which urea (2.51 g), resorcinol (0.25 g), and ammonium chloride (0.25 g) were then added with stirring. The pH of the resultant solution was adjusted to 3.5 using a 10% NaOH solution. One drop of 1-octanol was then added to this solution to eliminate surface bubbles. The resulting mixture was agitated at 500 rpm, and to the stirred solution was added 44.74 g of the core material, which consisted of DASA (0.2 g) and styrene (44.54 g = 49 mL) with a weight ratio of 1:220.61. To the agitated emulsion was added a 37 wt% formaldehyde (7.190 g, 0.0892 mol) solution, and the temperature of the resulting mixture was raised to 55°C, and heated at that temperature for 5.5 h. The reaction mixture was cooled to room temperature, and the microcapsules were separated using vacuum filtration. The microcapsules were washed with acetone and dichloromethane and then air-dried.



Table S2. Parameters of the microcapsules synthesized at different reaction conditions

| <b>Entry</b> | <b>rpm</b> | <b>D.W.</b><br>(mL) | <b>EMA</b><br>(mL) | <b>Styrene</b><br>(mL) | <b>Reaction</b><br><b>time (h)</b> | <b>mean size</b><br>( $\mu\text{m}$ ) | <b>shell thickness</b><br>( $\mu\text{m}$ ) | <b>Yield</b><br>(%) | <b>FWHM</b> |
|--------------|------------|---------------------|--------------------|------------------------|------------------------------------|---------------------------------------|---------------------------------------------|---------------------|-------------|
| <b>1</b>     | 500        | 85                  | 40                 | <b>49</b>              | <b>5.5</b>                         | 224.95                                | 0.170                                       | 61.84               | 186.11      |
| <b>2</b>     | 500        | 85                  | 40                 | <b>49</b>              | <b>7.5</b>                         | 255.58                                | 0.151                                       | 58.82               | 173.05      |
| <b>3</b>     | 500        | 85                  | 40                 | <b>40</b>              | <b>5.5</b>                         | 197.99                                | 0.145                                       | 55.08               | 218.48      |
| <b>4</b>     | 500        | 85                  | 40                 | <b>40</b>              | <b>7.5</b>                         | 197.99                                | 0.143                                       | 55.26               | 174.60      |
| <b>5</b>     | 500        | 85                  | 40                 | <b>30</b>              | <b>5.5</b>                         | 224.95                                | 0.146                                       | 48.52               | 199.88      |
| <b>6</b>     | 500        | 85                  | 40                 | <b>30</b>              | <b>7.5</b>                         | 224.95                                | 0.15                                        | 50.89               | 190.84      |
| <b>7</b>     | 500        | 85                  | 40                 | <b>20</b>              | <b>5.5</b>                         | 197.99                                | 0.174                                       | 32.36               | 207.76      |
| <b>8</b>     | 500        | 85                  | 40                 | <b>20</b>              | <b>7.5</b>                         | 197.99                                | 0.15                                        | 34.70               | 178.0       |
